# Supplementary material for: Feedback control for defect-free alignment of colloidal particles
Source: Royal Society of Chemistry journal article supplement (doi:10.1039/c8lc00369f), 2018-01-01
Supplement: c8lc00369f1.pdf [file c8lc00369f1.pdf]

1. For video-S1:

**Implementation of hierarchical feedback control from a high initial particle density**

2. For video-S2:

**Implementation of hierarchical feedback control from a low initial particle density**
